# Supplementary material
Source: PubMed Central journal article supplement (PMC3979510)
Supplement: NIHMS550235-supplement-4.pdf [file NIHMS550235-supplement-4.pdf]

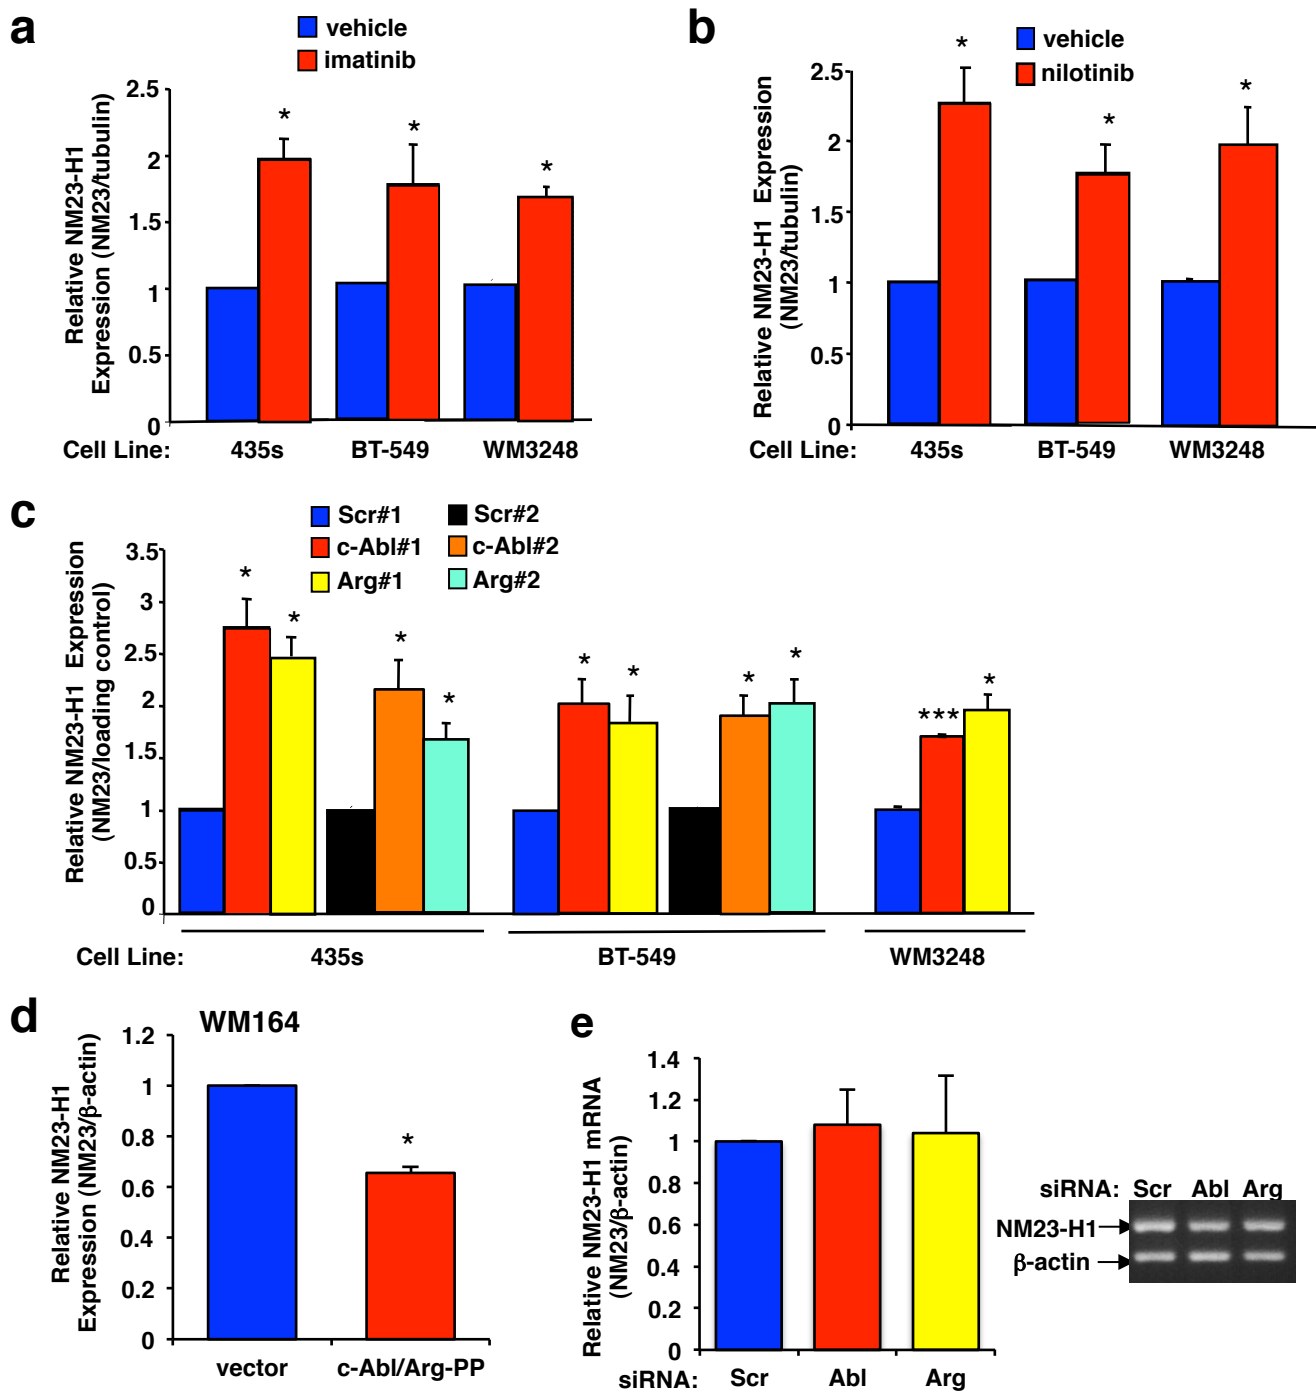

**Figure S4. Activation of c-Abl and Arg reduces expression of NM23H1.** (a,b) Cell lines expressing activated c-Abl/Arg (Fig. 3a,b) were treated with imatinib (10 $\mu$ M) (a), nilotinib (5 $\mu$ M) (b) or were transfected with scrambled (Scr), c-Abl or Arg siRNAs (2 independent sets) (c). NM23-H1 and  $\alpha$ -tubulin or  $\beta$ -actin expression were detected in cell lysates by western blot after 8h treatment (a,b) or 3 days after transfection (c), and bands quantitated with ImageQuant. (d) Low-invasive WM164 melanoma cells were transiently transfected with c-Abl-PP and Arg-PP (constitutively active forms). NM23-H1 and  $\alpha$ -tubulin expression were determined 3 days after transfection. (e) cDNA was prepared from RNA from 435s cells expressing c-Abl or Arg siRNAs, and subjected to semi-quantitative RT-PCR using NM23-H1 primers and internal control  $\beta$ -actin primers. For all subfigures, relative NM23-H1 expression (relative to loading control) was graphed (Mean $\pm$ SEM for 3-4 independent experiments). \* $p$ <0.05, \*\* $p$ <0.01, \*\*\* $p$ <0.001 using one-sample t-tests.
