# Supplementary material
Source: PubMed Central journal article supplement (PMC3979510)
Supplement: NIHMS550235-supplement-6.pdf [file NIHMS550235-supplement-6.pdf]

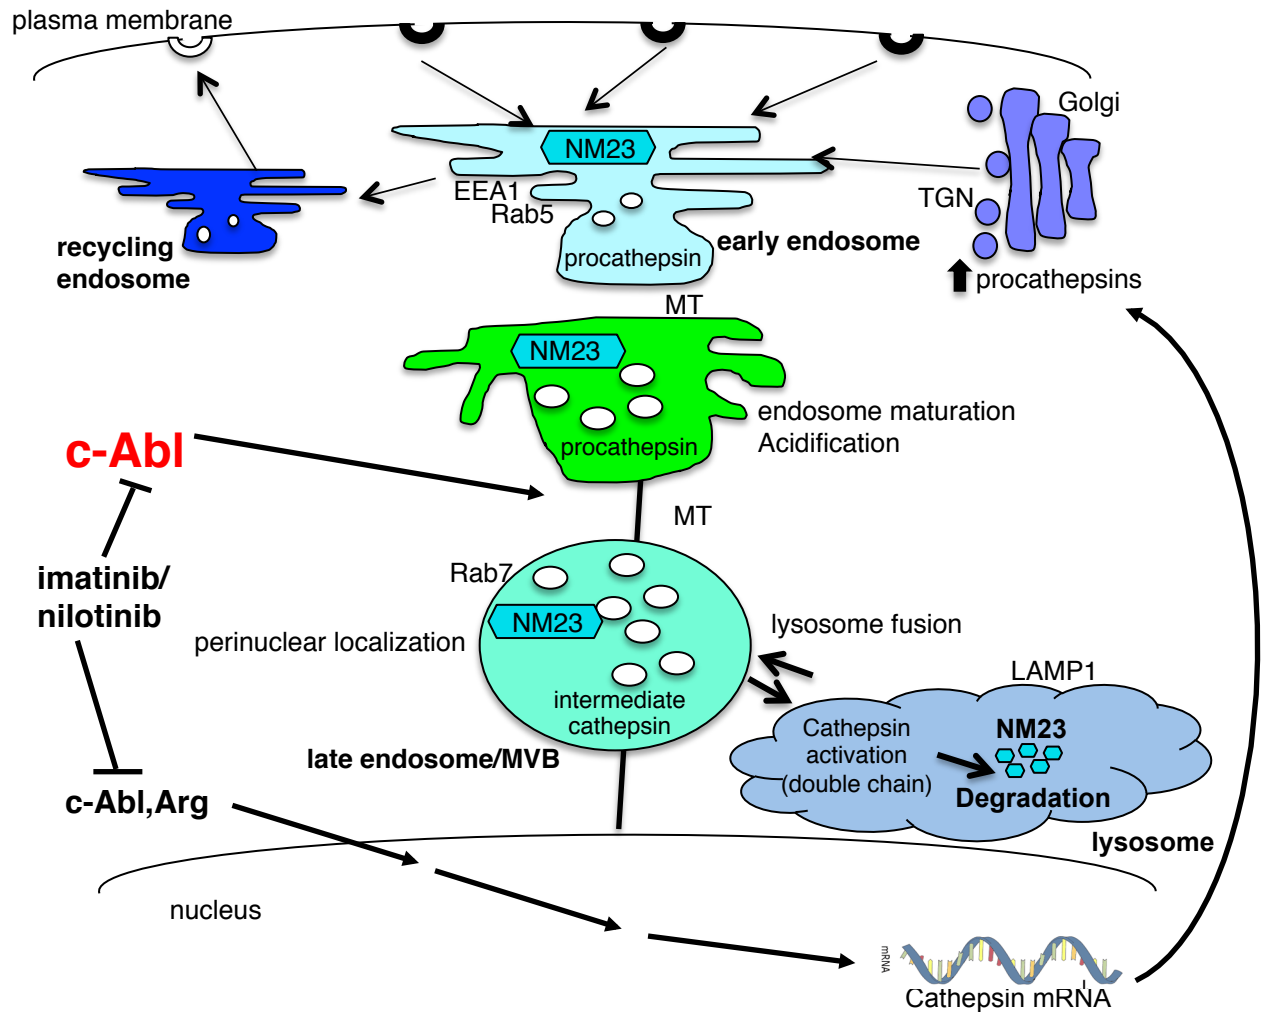

**Figure S6. Effect of c-Abl on endocytic trafficking.** Model for the mechanism by which c-Abl/Arg promote vesicular trafficking and NM23-H1 degradation. c-Abl and Arg promote expression of cysteine cathepsins B, L by increasing mRNA levels and c-Abl induces cathepsin activation by promoting endosome->lysosome trafficking. Endosomal NM23-H1 is transported to lysosomes and degraded by lysosomal cathepsins B,L. Inhibition or silencing c-Abl/Arg prevents cathepsin expression and activation, which leads to stabilization of NM23-H1. MT=microtubules, MVB=multi-vesicular body.
