# Supplementary material
Source: PubMed Central journal article supplement (PMC3979510)
Supplement: NIHMS550235-supplement-7.pdf [file NIHMS550235-supplement-7.pdf]

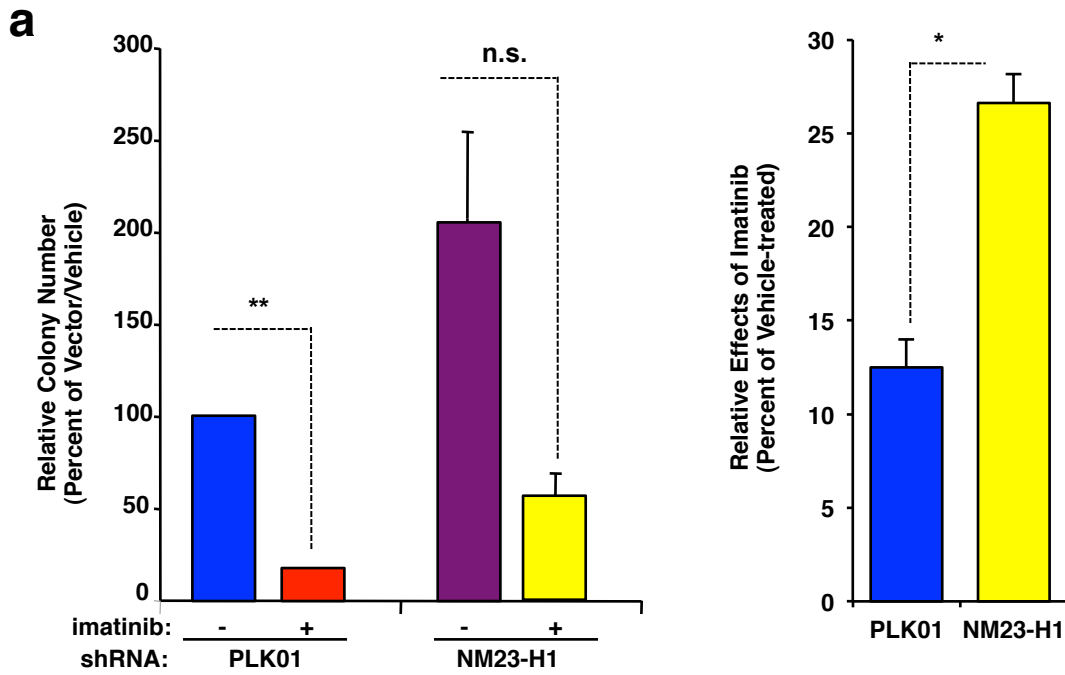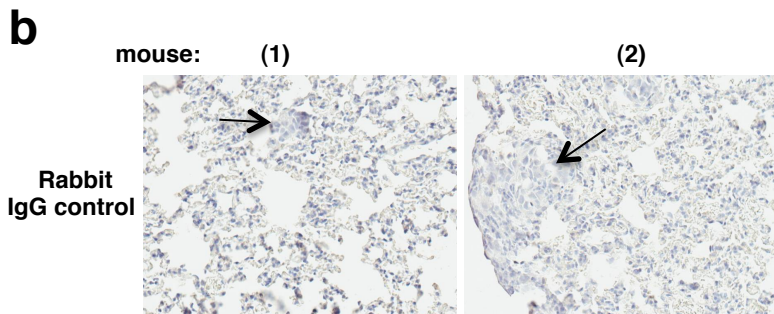

**Figure S7. c-Abl/Arg promote anchorage-independent growth via NM23-H1-dependent and -independent pathways (a)** 435s cells expressing either vector (PLK01) or NM23-H1 shRNA were plated in soft agar in the absence or presence of imatinib (10 $\mu$ M). After 3 weeks incubation, colonies (>100 $\mu$ m) were counted and plotted. Experiments were performed in triplicate. Graphs are Mean $\pm$ SEM for two independent experiments performed in triplicate. Data were graphed relative to vector control, vehicle-treated (left). Comparison of imatinib effects in vector and NM23-H1 shRNA-expressing cells (fold changes; right). \* $p$ <0.05, \*\* $p$ <0.01 using one-sample t-tests. n.s. denotes non-significance for the paired comparison. Some error bars are too small to visualize. **(b)** Rabbit IgG controls for rabbit anti-pCrk/CrkL and rabbit anti-NM23 (D98) immunohistochemistry shown in Figure 6h. Arrows denote metastases.
