# Supplementary material
Source: PubMed Central journal article supplement (PMC3979510)
Supplement: NIHMS550235-supplement-8.pdf [file NIHMS550235-supplement-8.pdf]

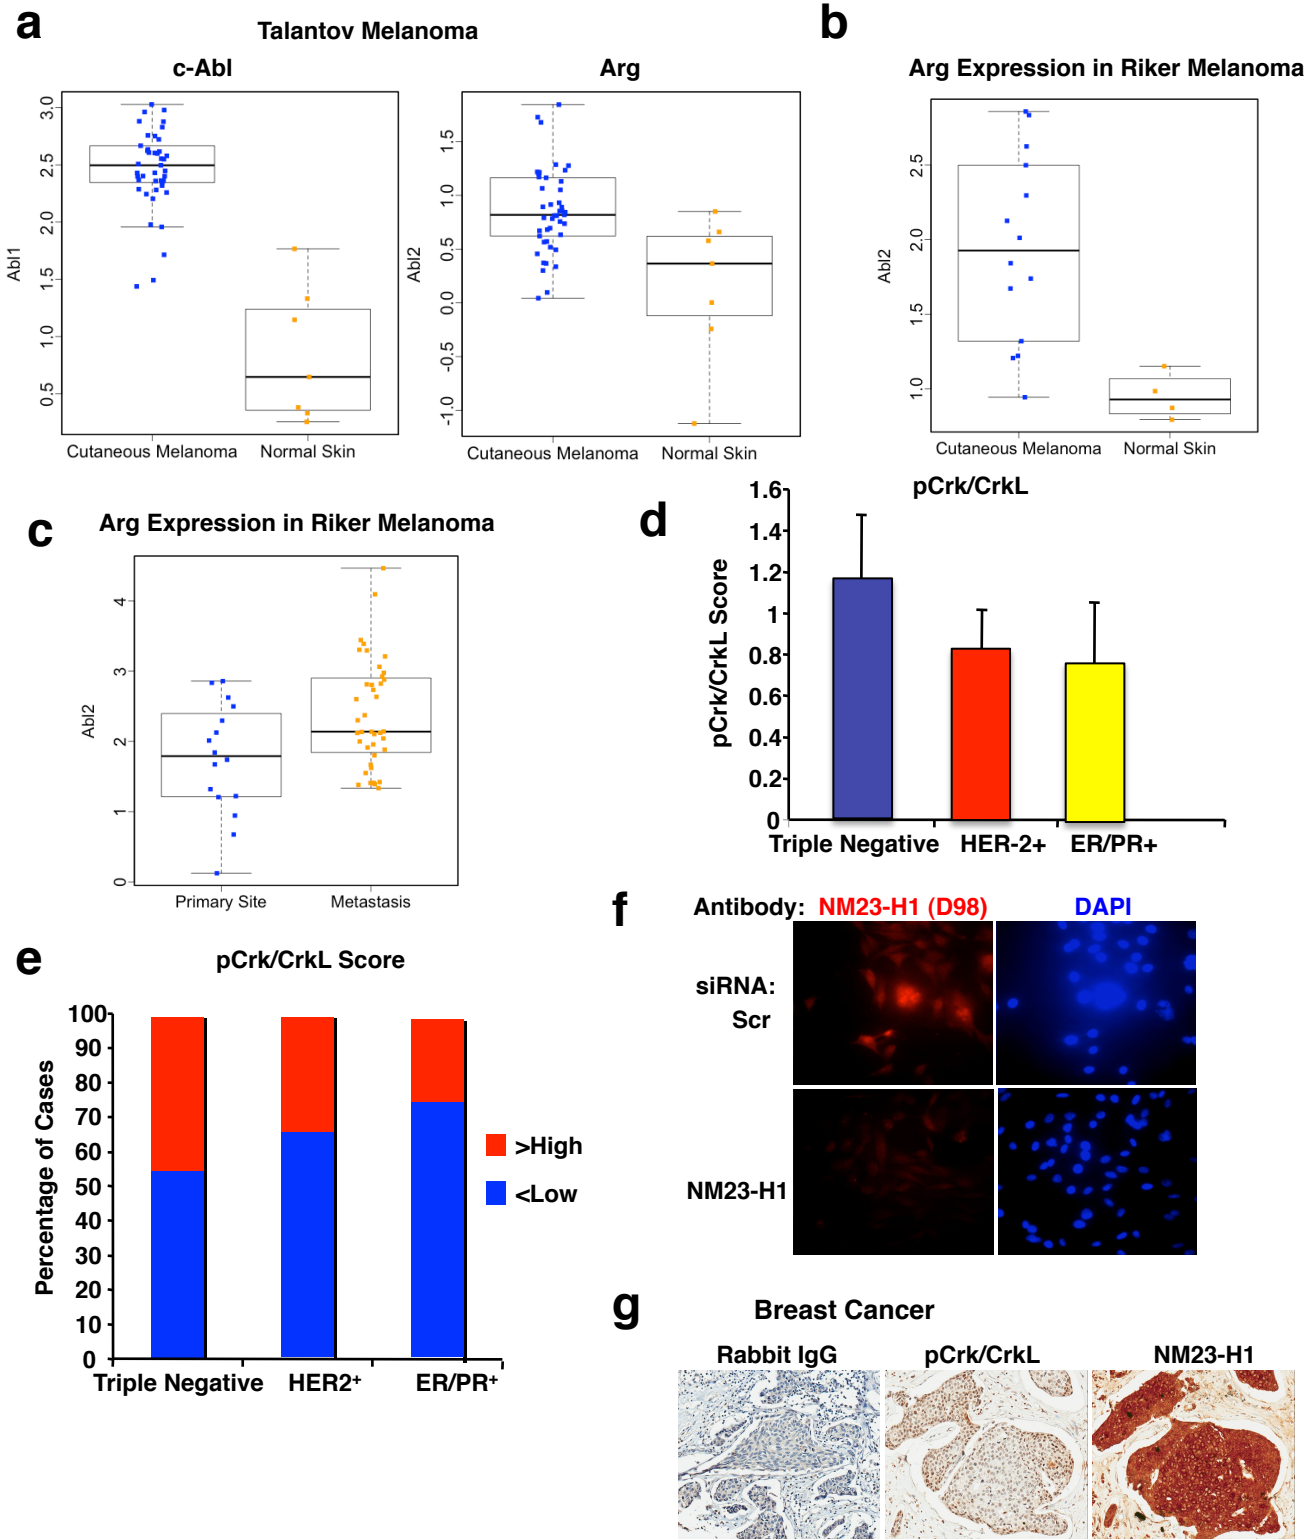

**Figure S8. c-Abl and Arg expression in primary melanomas and breast cancers.** (a-c). Data from OncoPrint™ (Compendia Bioscience, Ann Arbor, MI) was downloaded and statistically reanalyzed using two sample t-tests. (a) Talantov study. c-Abl (Abl1) and Arg (Abl2) expression is increased in primary melanomas relative to normal skin. Abl,  $p=1.7E-4$ , Fold change=3.17; Arg,  $p=0.03$ , fold=1.7. (b,c) Riker study. (b) Arg (Abl2) is overexpressed in melanomas vs. normal skin. Average of three independent probe sets. Arg  $p=6.5E-5$ , fold change=2. (c) Arg expression is greater in metastases than in primary melanomas. Average of 3 probe sets.  $p=0.01$ , fold=1.56. (d,e) BR10010a TMA serial sections were stained with pCrk/CrkL antibody. Graphs are Mean $\pm$ SEM of scores (intensity \* proportion of positively staining tumor cells). (f) 435s cells were transfected with scrambled or NM23-H1 siRNAs, and stained with NM23-H1 antibody (D98, used for immunohistochemistry), followed by fluorescent-conjugated secondary antibodies, and counterstained with DAPI. (g) Immunohistochemical staining using pCrk/CrkL, NM23-H1 or rabbit IgG antibodies in a breast cancer TMA.
